# Supplementary material for: Clinical Impact of Hormone Replacement Therapy on Atrial Fibrillation in Postmenopausal Women: A Nationwide Cohort Study
Source: MDPI journal article supplement (doi:10.3390/jcm10235497), 2021-11-24
Supplement: s1 [file s1]

**Table S1. Ascertainment of disease and medication.**

| Outcome                                                |                         | Definition by ICD-10                                                                                                                                                          |
|--------------------------------------------------------|-------------------------|-------------------------------------------------------------------------------------------------------------------------------------------------------------------------------|
| Atrial fibrillation                                    |                         | I48                                                                                                                                                                           |
| Comorbidities                                          |                         | Definition by ICD-10                                                                                                                                                          |
| Acute myocardial infarction                            |                         | I21, I25.2                                                                                                                                                                    |
| Heart failure                                          |                         | I50                                                                                                                                                                           |
| Valvular heart disease                                 |                         | I05,I34,I06,I35                                                                                                                                                               |
| Cardiomyopathy                                         |                         | I42.0, I42.1, I42.2                                                                                                                                                           |
| Cerebrovascular disease                                |                         | I60-64, I69                                                                                                                                                                   |
| Chronic pulmonary disease                              |                         | J42-J47, J60-67, J70.1, J70.3                                                                                                                                                 |
| Severe liver disease                                   |                         | K70.3, K71.7, K72.1, K72.9, K74.3-6, I85, I86.4, I98.2                                                                                                                        |
| Severe diabetes mellitus                               |                         | E10.2, E10.3, E10.4, E10.5, E10.7, E11.2, E11.3, E11.4, E11.5, E11.7, E12.2, E12.3, E12.4, E12.5, E12.7, E13.2, E13.3, E13.4, E13.5, E13.7, E14.2, E14.3, E14.4, E14.5, E14.7 |
| Hemiplegia                                             |                         | G04.1, G11.4, G80.1, G81, G82, G83.0-4, G83.9                                                                                                                                 |
| Chronic renal disease                                  |                         | N18, Z94.0, Z49.1, Z49.2, Z99.2, T861                                                                                                                                         |
| Malignancy                                             |                         | C00-97                                                                                                                                                                        |
| Coronary artery disease                                |                         | Women who were diagnosed with coronary artery disease and even received interventional or surgical treatments.                                                                |
| Diagnosis (ICD-10)                                     |                         | I20, I22, I23, I24, I25.1, I25.3, I25.4, I25.5, I25.6, I25.7, I25.8, I25.9                                                                                                    |
| Interventional or surgical treatments (procedure code) |                         | M6551,M6552,M6561,M6562,M6563,M6564,M6571,M6572,M6601,M6602,O1641,O1642,O1647,OA641,OA642,OA647                                                                               |
| Medication                                             |                         | Definition by prescription code                                                                                                                                               |
| Estrogen-only HRT                                      |                         | Women who have been prescribed estrogen, but not progestin.                                                                                                                   |
| Estrogen                                               | CEE                     | 155401ATB, 155402ATB, 155404ATB                                                                                                                                               |
|                                                        | E2                      | 155001ATB, 155002ATB, 154901ATB, 154903ATB                                                                                                                                    |
|                                                        | transdermal E2          | 154931CCM, 154604CPC                                                                                                                                                          |
| Progestin                                              | Cyproterone             | 139401ATB                                                                                                                                                                     |
|                                                        | Dienogest               | 615701ATB                                                                                                                                                                     |
|                                                        | Dydrogesterone          | 150501ATB                                                                                                                                                                     |
|                                                        | LNG-IUS                 | 183401CIM                                                                                                                                                                     |
|                                                        | Megestrol acetate       | 189301ASS, 189301ATB, 189302ATB, 189303ASS, 189304ASS, 189330ASS, 189331ASS, 189335ASS, 202901ATB                                                                             |
|                                                        | MPA                     | 188903ATB, 188904ATB, 188905ATB, 188906ATB                                                                                                                                    |
|                                                        | MPA depot injection     | 188902BIJ                                                                                                                                                                     |
|                                                        | Micronized progesterone | 195001ACS                                                                                                                                                                     |

| Estrogen+progestin HRT    | Women who have been prescribed both estrogen and progestin. |
|---------------------------|-------------------------------------------------------------|
| CEE+MPA                   | 298100ATB, 465500ATB, 453500ATB, 297200ATB, 297300ATB       |
| E2+Cypoterone acetate     | 398400ATB                                                   |
| E2+Drospriene             | 490400ATB                                                   |
| E2+dydrogesterone         | 297400ATB, 433700ATB, 433800ATB                             |
| E2+norethisterone acetate | 297100ATB, 297000ATB, 507600ATB, 298200ATB                  |
| E2+MPA                    | 433900ATB, 434000ATB, 434100ATB, 297600ATB                  |

Abbreviation: ICD-10, International Classification of Diseases, 10th edition; HRT, hormone replacement therapy; CEE, conjugated equine estrogens; E2, estradiol; LNG-IUS, levonorgestrel-releasing intrauterine system; MPA, medroxyprogesterone acetate; P, progestin.
